# Supplementary material
Source: PubMed Central journal article supplement (PMC8930616)
Supplement: NIHMS1782963-supplement-1.pdf [file NIHMS1782963-supplement-1.pdf]

**Figure S1**

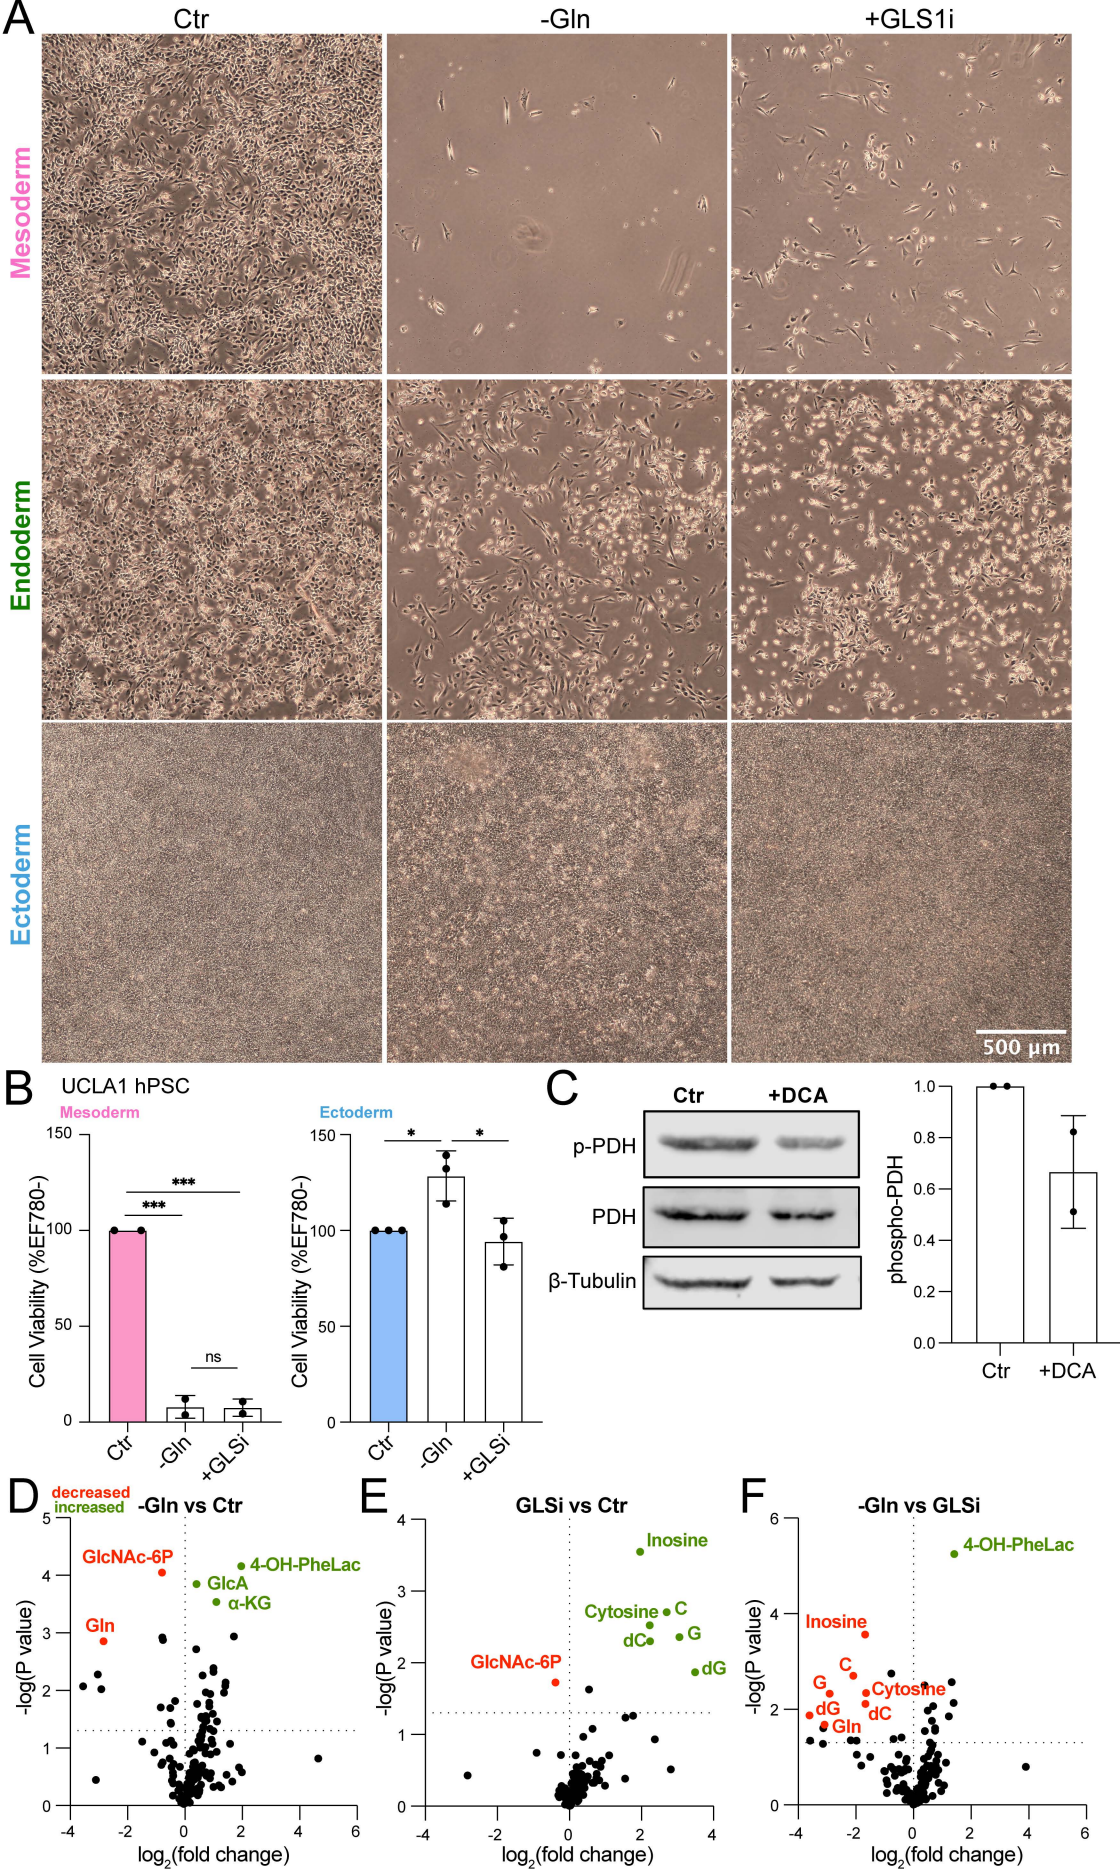

### **Supplemental Figure S1. Cell viability images and quantification under Gln deprivation**

*Related to Figure 1*

**(A)** Representative brightfield images of cell viability and confluency of D5 mesoderm, D3 endoderm, and D5 ectoderm grown in Gln-supplemented (Ctr), Gln-free (-Gln), or glutaminolysis-inhibited (+GLS1i) conditions. Scale bar indicates 500  $\mu$ m.

**(B)** Cell viability of UCLA1-derived D5 mesoderm (n=2) and ectoderm cells relative to Ctr.

**(C)** Immunoblot and densitometry quantification of phosphorylated pyruvate dehydrogenase (PDH) and total PDH expression after 24h 1 mM DCA treatment (n=2).

**(D-F)** Volcano plots of differential metabolite abundance in **(D)** -Gln vs Ctr, **(E)** GLS1i vs Ctr, and **(F)** -Gln vs GLS1i conditions, quantified by UHPLC-MS. Differential fold change is plotted against raw p values for each metabolite comparison.

Data represent mean  $\pm$  SD of  $n \geq 3$  biological replicates unless indicated otherwise. \* $p \leq 0.05$ ; \*\* $p \leq 0.01$ ; \*\*\* $p \leq 0.001$ . The p values were determined by **(B)** one-way ANOVA with correction for multiple comparisons, or **(D-F)** using the Student's t test

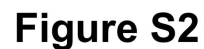

## **Supplemental Figure S2. Tri-lineage metabolomics profiles in Gln-free media**

*Related to Figure 2*

**(A-B)** Immunoblot of GS expression in **(A)** UCLA1-derived ectoderm and **(B)** H9-derived mesoderm and endoderm cells differentiated in Gln-free media.

**(C)** Intracellular amounts of Gln,  $\alpha$ -KG,  $^{13}\text{C}_5$ -Gln, and  $^{13}\text{C}_5$ - $\alpha$ -KG derived from  $^{13}\text{C}_5$ -glutamic acid in D3 mesoderm, endoderm, and ectoderm cells grown in Gln-supplemented or Gln-free media.

**(D)** Percentage of (Left) D5 mesoderm (SNAI2/SLUG<sup>+</sup>) and (Right) D3 endoderm (SOX17<sup>+</sup>) cells grown in Gln-supplemented or Gln-free conditions with 50  $\mu\text{M}$  DON or 1 mM MSO.

**(E)** Verification of intracellular uptake and conversion to related metabolites upon respective metabolite supplementations (denoted in red), quantified by UHPLC-MS. Intensity values represent area under the curve (arbitrary units).

**(F)** (Left) Cell viability of UCLA1-derived D5 ectoderm cells differentiated in Gln-starvation and supplemented with GlcN6P, dm- $\alpha$ -KG, nucleosides, or GSH. (Right) Percentage of D5 ectoderm (PAX6<sup>+</sup>MAP2B<sup>+</sup>) cells grown in Gln-starvation with added GlcN6P or both GlcN6P and nucleosides (nuc). Data represent mean  $\pm$  SD of  $n = 3$  biological replicates. \* $p \leq 0.05$ ; \*\* $p \leq 0.01$ ; \*\*\* $p \leq 0.001$ ; \*\*\*\* $p \leq 0.0001$ . The  $p$  values were determined using **(C, D, F)** one-way ANOVA with correction for multiple comparisons or **(E)** Student's  $t$  test.

Figure S3

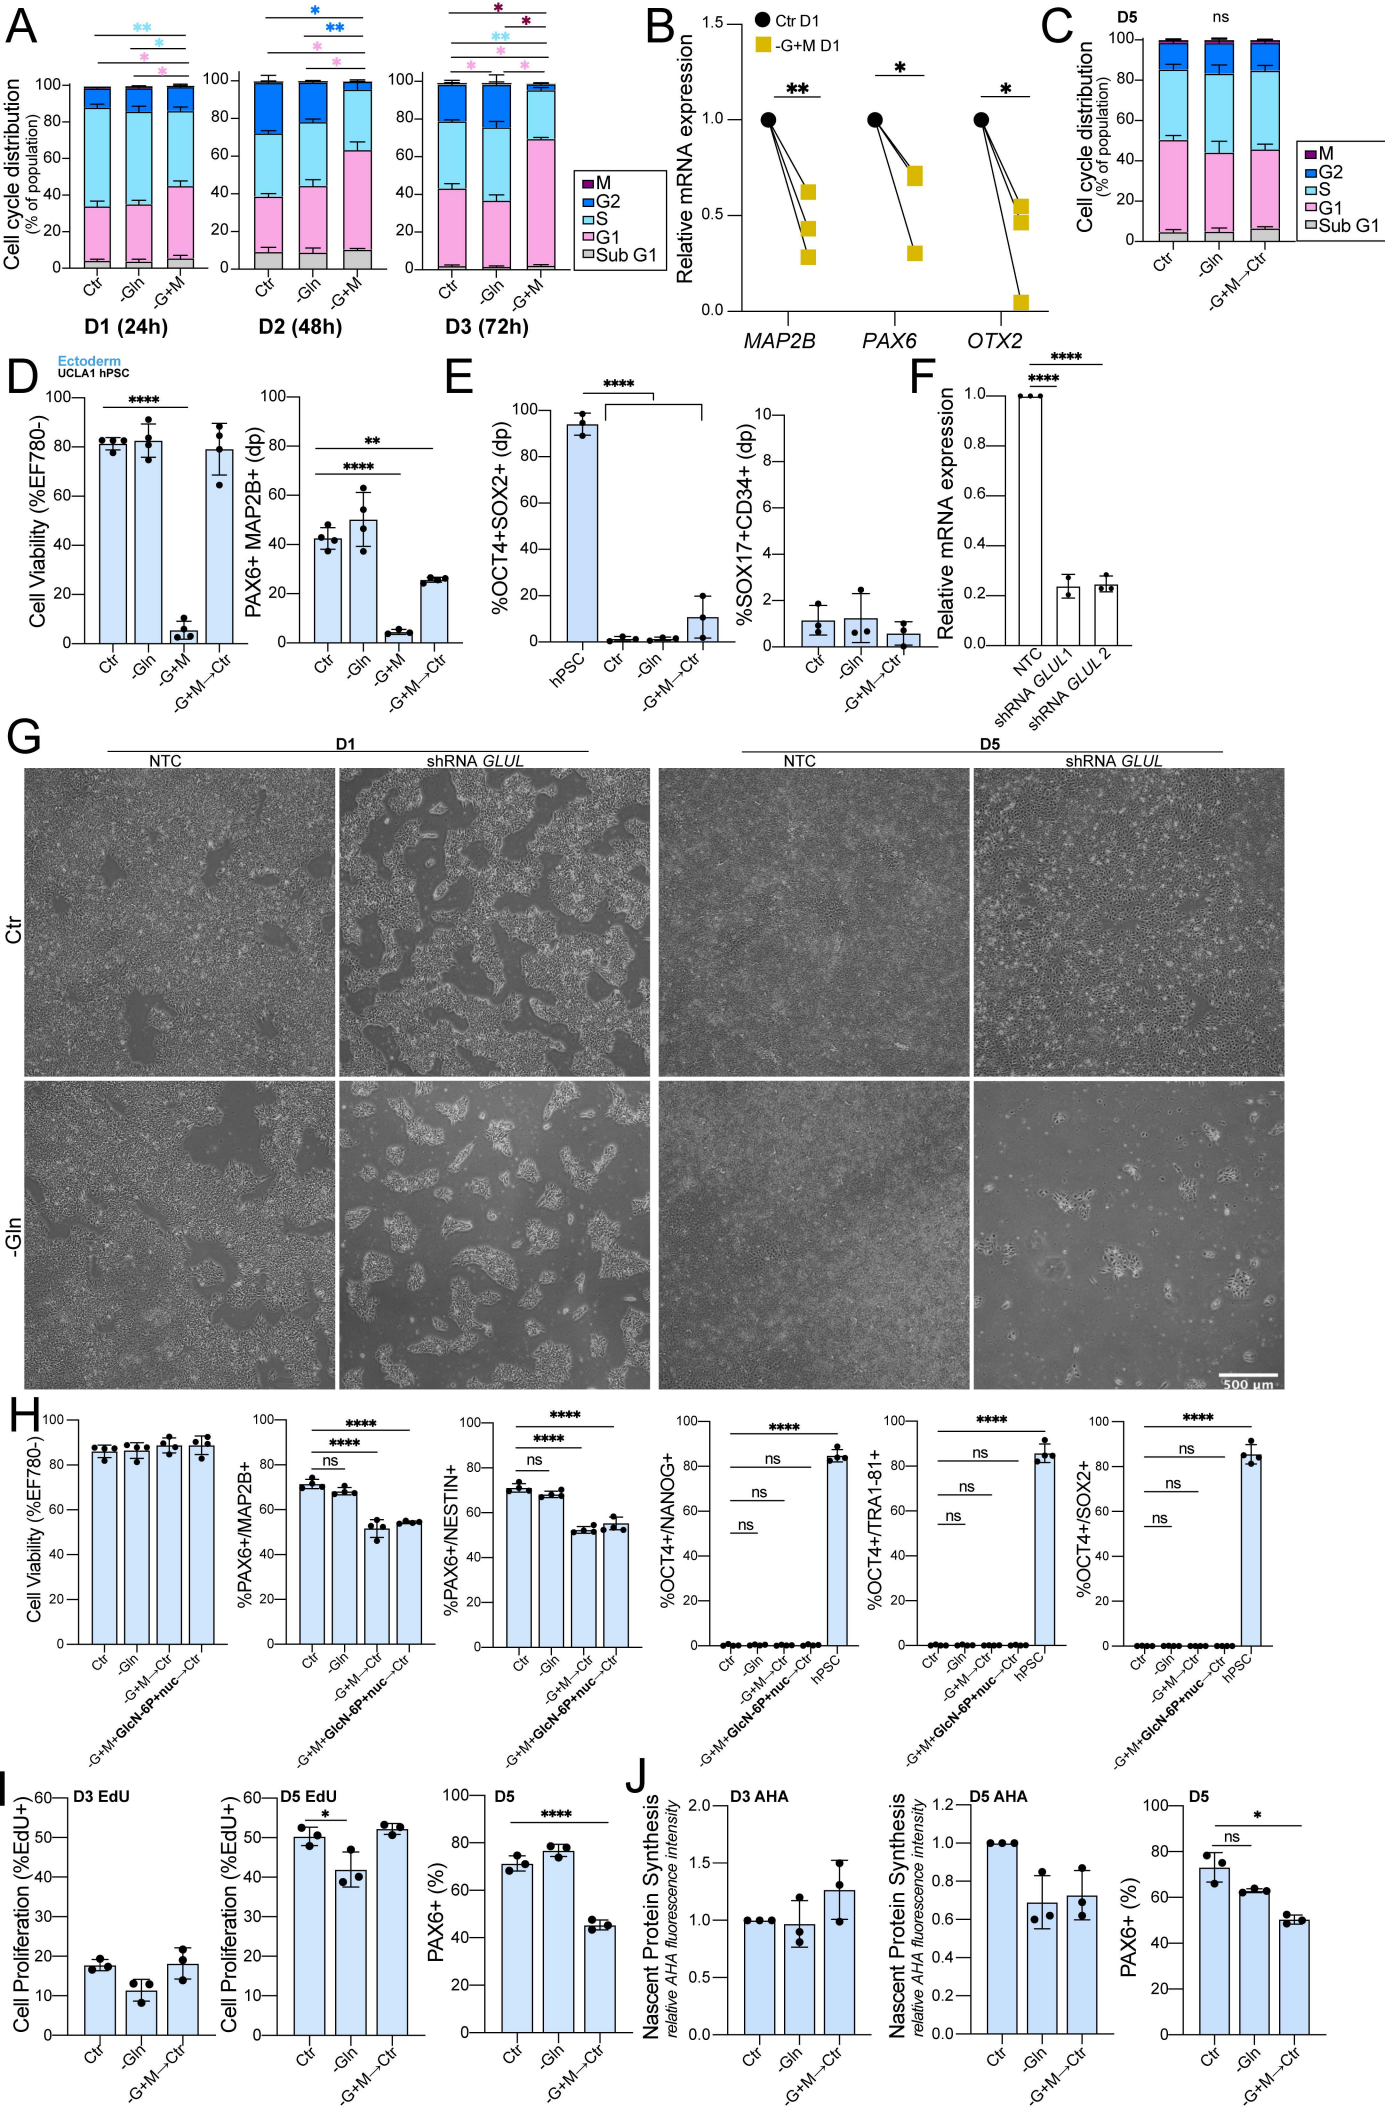

**Supplemental Figure S3. Cell cycle distribution, cell proliferation, and nascent protein synthesis during Gln repletion following 14h Gln-starvation**

*Related to Figure 3*

**(A)** Flow cytometry cell cycle distribution of ectoderm cells differentiated in continuous Gln-starvation for D1 (24h), D2 (48h), and D3 (72h), colored \*p symbols represent corresponding cell cycle stage with significant difference across indicated conditions.

**(B)** qRT-PCR analysis of *MAP2B*, *PAX6*, and *OTX2* expression in D1 (24h) ectoderm cells grown in Gln-starvation.

**(C)** Flow cytometry cell cycle distribution of D5 ectoderm cells after initial 24h Gln-starvation (-G+M→Ctr).

**(D)** (Left) Cell viability and (Right) percentage of UCLA1-derived D5 ectoderm (*PAX6*<sup>+</sup>*MAP2B*<sup>+</sup>) cells after initial 24h Gln-starvation (G+M→Ctr).

**(E)** Percentage of pluripotent (*OCT4*<sup>+</sup>*SOX2*<sup>+</sup>) and endoderm/mesoderm (*SOX17*<sup>+</sup>*CD34*<sup>+</sup>) biomarkers in D5 ectoderm cells after initial 24h Gln-starvation (-G+M→Ctr).

**(F)** qRT-PCR analysis of *GLUL* (encoding GS) in H9 hPSCs expressing shRNA targeting *GLUL* (shRNA *GLUL1*, clone 1; shRNA *GLUL2*, clone 2) or a non-targeting control (NTC).

**(G)** Representative brightfield images of H9-derived ectoderm cells expressing shRNA targeting *GLUL* (shRNA *GLUL*) or a non-targeting control (NTC) grown continuously in Gln-free media at D1 (24h) and D5 (120h). Scale bar indicates 500 μm.

**(H)** Cell viability and percentage of ectoderm (*PAX6*<sup>+</sup>*MAP2B*<sup>+</sup>, *PAX6*<sup>+</sup>*NESTIN*<sup>+</sup>) and pluripotent (*OCT4*<sup>+</sup>*NANOG*<sup>+</sup>, *OCT4*<sup>+</sup>*TRA1-81*<sup>+</sup>, *OCT4*<sup>+</sup>*SOX2*<sup>+</sup>) biomarkers in D5 ectoderm cells after initial 14h Gln-starvation (-G+M→Ctr) or metabolite-supplemented Gln-starvation (-G+M+GlcN-6P+nuc →Ctr).

**(I)** Cell proliferation (EdU+ staining) in D3 and D5 ectoderm cells after initial 14h Gln-starvation.

**(J)** Nascent protein synthesis (relative AHA staining) in D3 and D5 ectoderm cells after initial 14h Gln-starvation.

Data represent mean ± SD of n ≥ 3 biological replicates. \*p ≤ 0.05; \*\*p ≤ 0.01; \*\*\*p ≤ 0.001; \*\*\*\*p ≤ 0.0001. The p values were determined by **(A, C)** two-way ANOVA, **(B)** Student's t test, **(D-F, H-J)** or one-way ANOVA with correction for multiple comparisons.

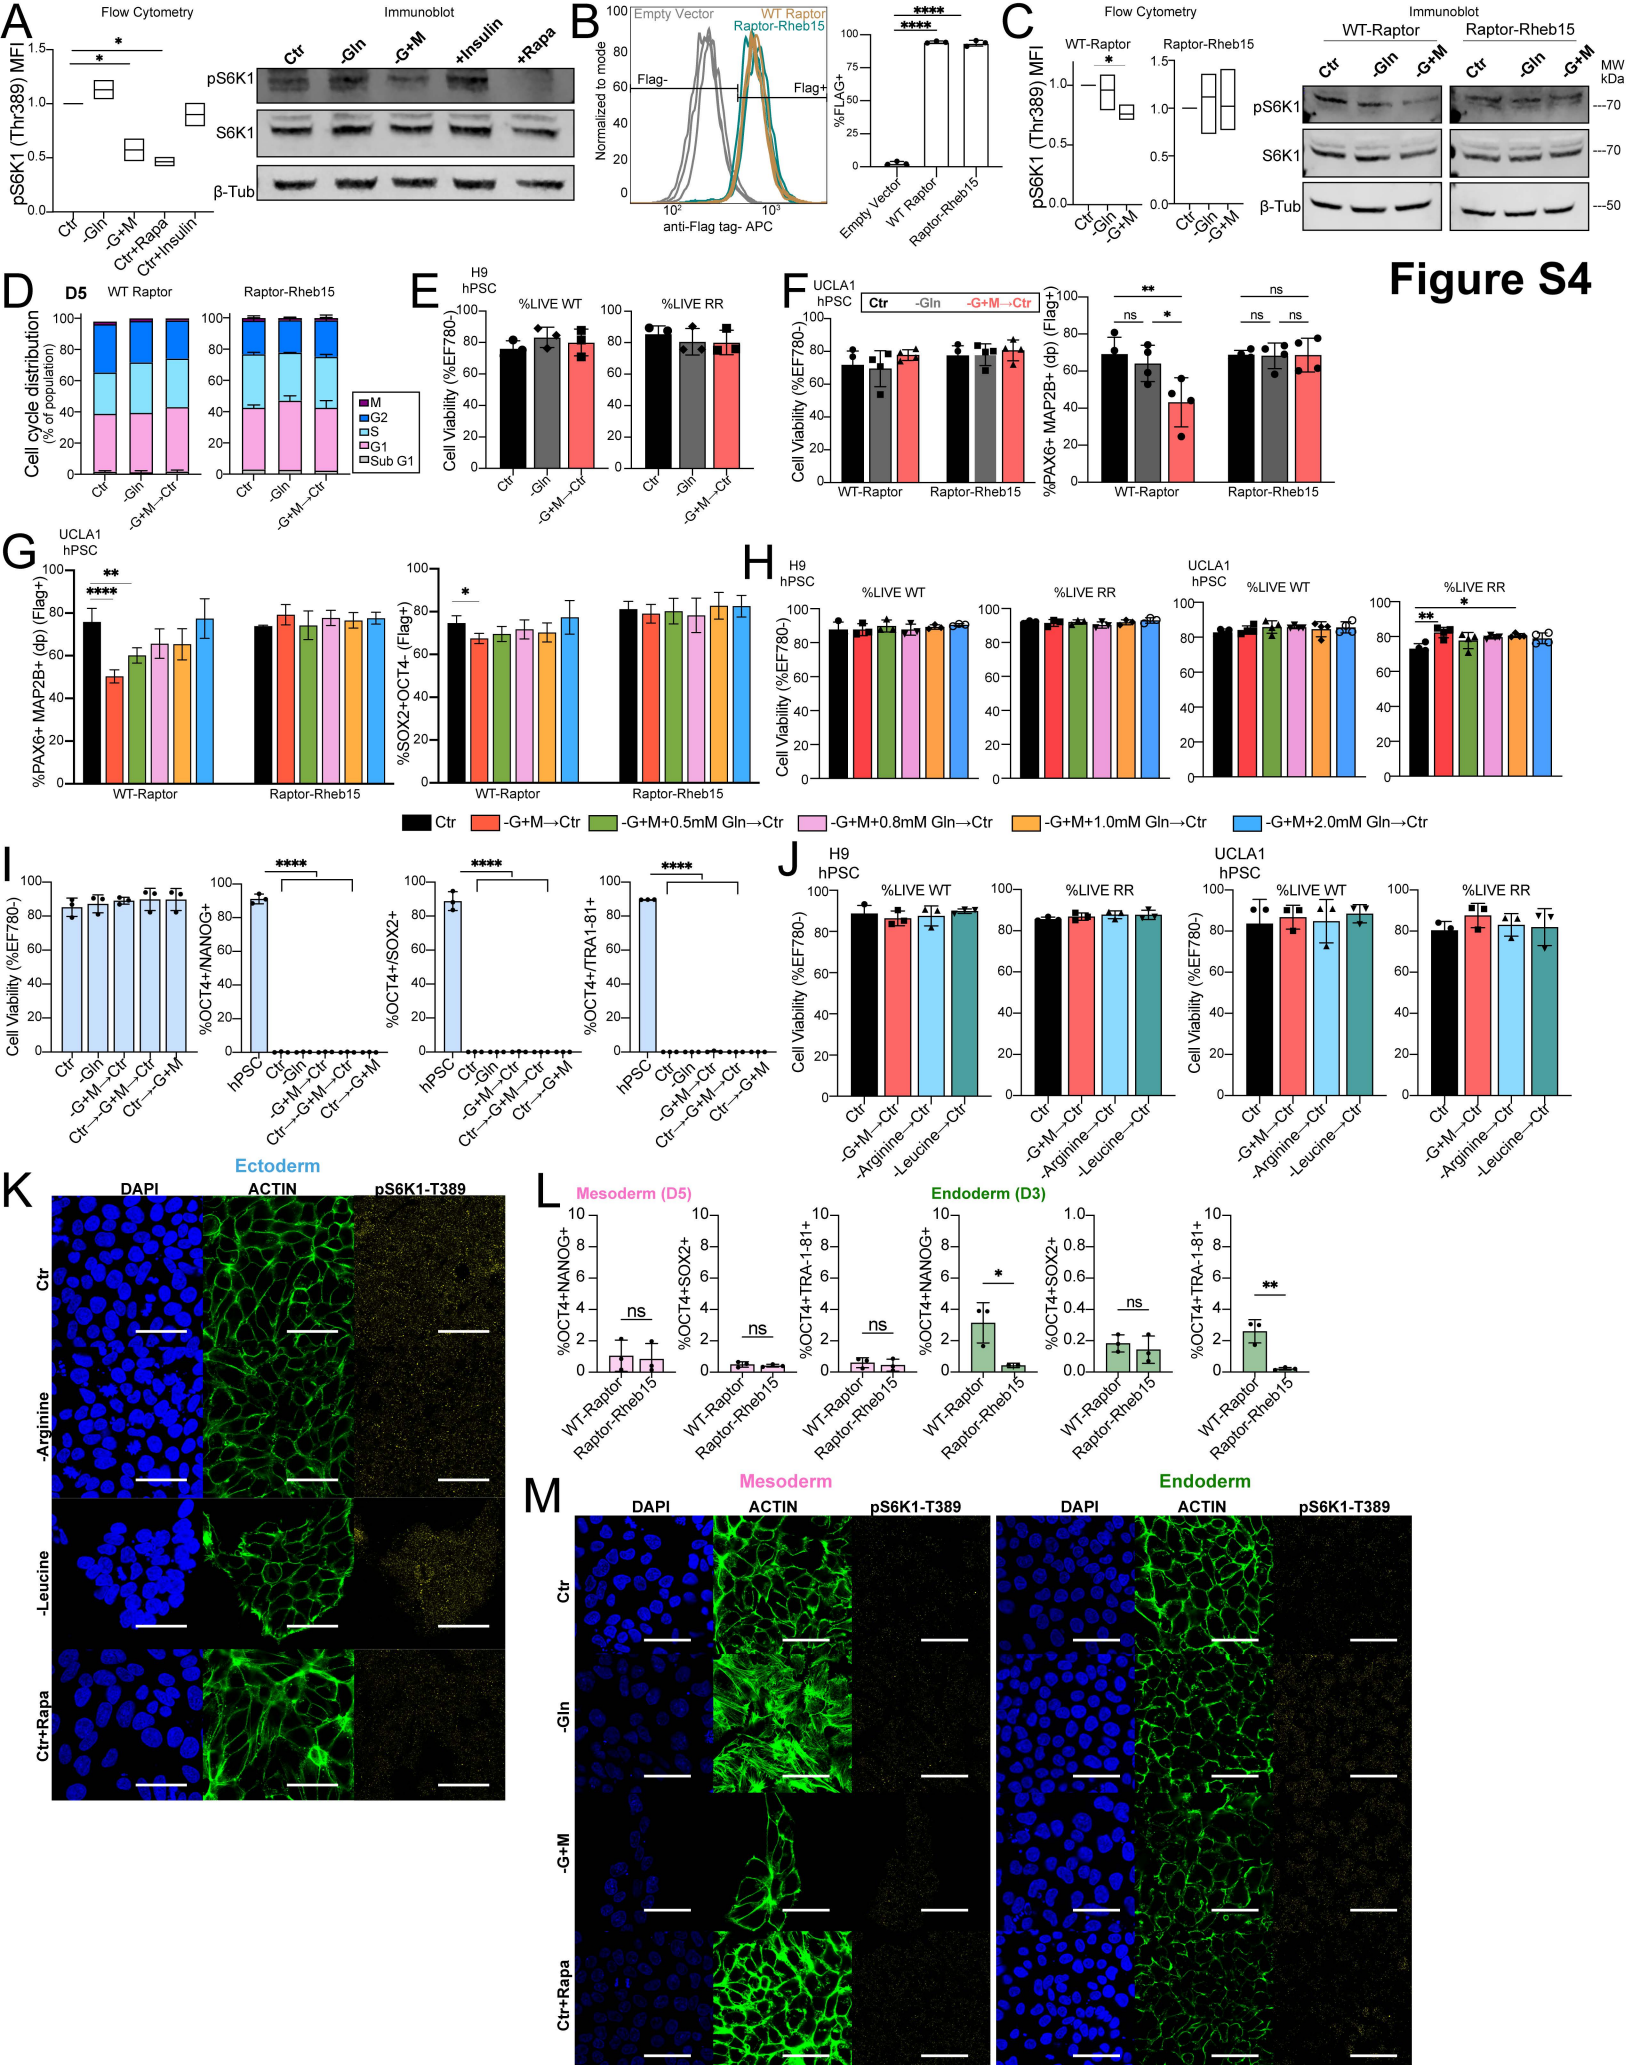

#### **Supplemental Figure S4. mTORC1 inactivation under Gln-starvation**

*Related to Figure 4*

- (A)** (Left) Flow cytometry quantification and (Right) representative immunoblot of mTORC activation (pS6K1-Thr389) immediately after 24h Gln-starved ectoderm differentiation.
- (B)** Flow cytometry traces and quantification of %FLAG<sup>+</sup> cells in H9-derived Empty Vector, WT-Raptor, and Raptor-Rheb15 hPSC lines.
- (C)** (Left) Flow cytometry quantification and (Right) representative immunoblot of mTORC activation (pS6K1-Thr389) immediately after 14h Gln-starved ectoderm differentiation in H9-derived WT-Raptor or Raptor-Rheb15 hPSC lines.
- (D)** Flow cytometry cell cycle distribution of H9-derived D5 WT-Raptor or Raptor-Rheb15 ectoderm cells after initial 14h Gln-starvation (-G+M→Ctr).
- (E)** Cell viability of H9-derived D5 WT-Raptor or Raptor-Rheb15 ectoderm cells after initial 14h Gln-starvation (-G+M→Ctr).
- (F)** (Left) Cell viability and (Right) percentage of UCLA1-derived D5 WT-Raptor or Raptor-Rheb15 ectoderm (PAX6<sup>+</sup>MAP2B<sup>+</sup>FLAG<sup>+</sup>) cells after initial 14h Gln-starvation (-G+M→Ctr).
- (G)** Percentage of UCLA1-derived D5 WT-Raptor or Raptor-Rheb15 ectoderm (PAX6<sup>+</sup>MAP2B<sup>+</sup>FLAG<sup>+</sup>, SOX2<sup>+</sup>OCT4<sup>+</sup>FLAG<sup>+</sup>) cells after initial 14h Gln-starvation with increasing concentrations of exogenous Gln supplementation.
- (H)** Cell viability of (Left) H9 or (Right) UCLA1-derived D5 ectoderm cells after initial 14h Gln-starvation with increasing concentrations of exogenous Gln supplementation.
- (I)** (Left) Cell viability and (Right) percentage of pluripotent (OCT4<sup>+</sup>NANOG<sup>+</sup>, OCT4<sup>+</sup>SOX2<sup>+</sup>, OCT4<sup>+</sup>TRA1-81<sup>+</sup>) biomarkers in H9-derived D5 ectoderm cells after initial (-G+M→Ctr), intermediate (Ctr→-G+M→Ctr), or late (Ctr→-G+M) 14h Gln-starvation.
- (J)** Cell viability in (Left) H9 or (Right) UCLA1-derived D5 ectoderm differentiation after initial 14h Gln-starvation, Arg deprivation, or Leu deprivation in WT-Raptor or Raptor-Rheb15 hPSC lines.
- (K)** Representative immunofluorescence images of mTORC activation in H9-derived ectoderm cells grown for 14h in Gln-supplemented (Ctr), Arginine-free (-Arginine), Leucine-free (-Leucine), or 200 nM rapamycin treatment (Ctr+Rapa). DAPI (blue, nucleus); ACTIN (green, cytoskeleton); pS6K1-Thr389 (yellow, mTORC1 activation). Scale bar indicates 50  $\mu$ m.
- (L)** Percentage of pluripotent (OCT4<sup>+</sup>NANOG<sup>+</sup>, OCT4<sup>+</sup>SOX2<sup>+</sup>, OCT4<sup>+</sup>TRA1-81<sup>+</sup>) biomarkers in H9-derived WT-Raptor or Raptor-Rheb15 D5 mesoderm and D3 endoderm cells.
- (M)** Representative immunofluorescence images of mTORC activation in H9-derived (Left) mesoderm and (Right) endoderm cells grown for 24h in Gln-supplemented (Ctr), Gln-free (-Gln), Gln-starvation (-G+M), or 200 nM rapamycin treatment (Ctr+Rapa). DAPI (blue, nucleus); ACTIN (green, cytoskeleton); pS6K1-Thr389 (yellow, mTORC1 activation). Scale bar indicates 50  $\mu$ m.

Data represent mean  $\pm$  SD or **(A, C)** min and max of  $n \geq 3$  biological replicates. \* $p \leq 0.05$ ; \*\* $p \leq 0.01$ ; \*\*\* $p \leq 0.001$ ; \*\*\*\* $p \leq 0.0001$ . The  $p$  values were determined by **(A-C, E, H-J)** one-way ANOVA, **(D, F-G)** two-way ANOVA with correction for multiple comparisons, or **(L)** Student's  $t$  test.

Figure S5

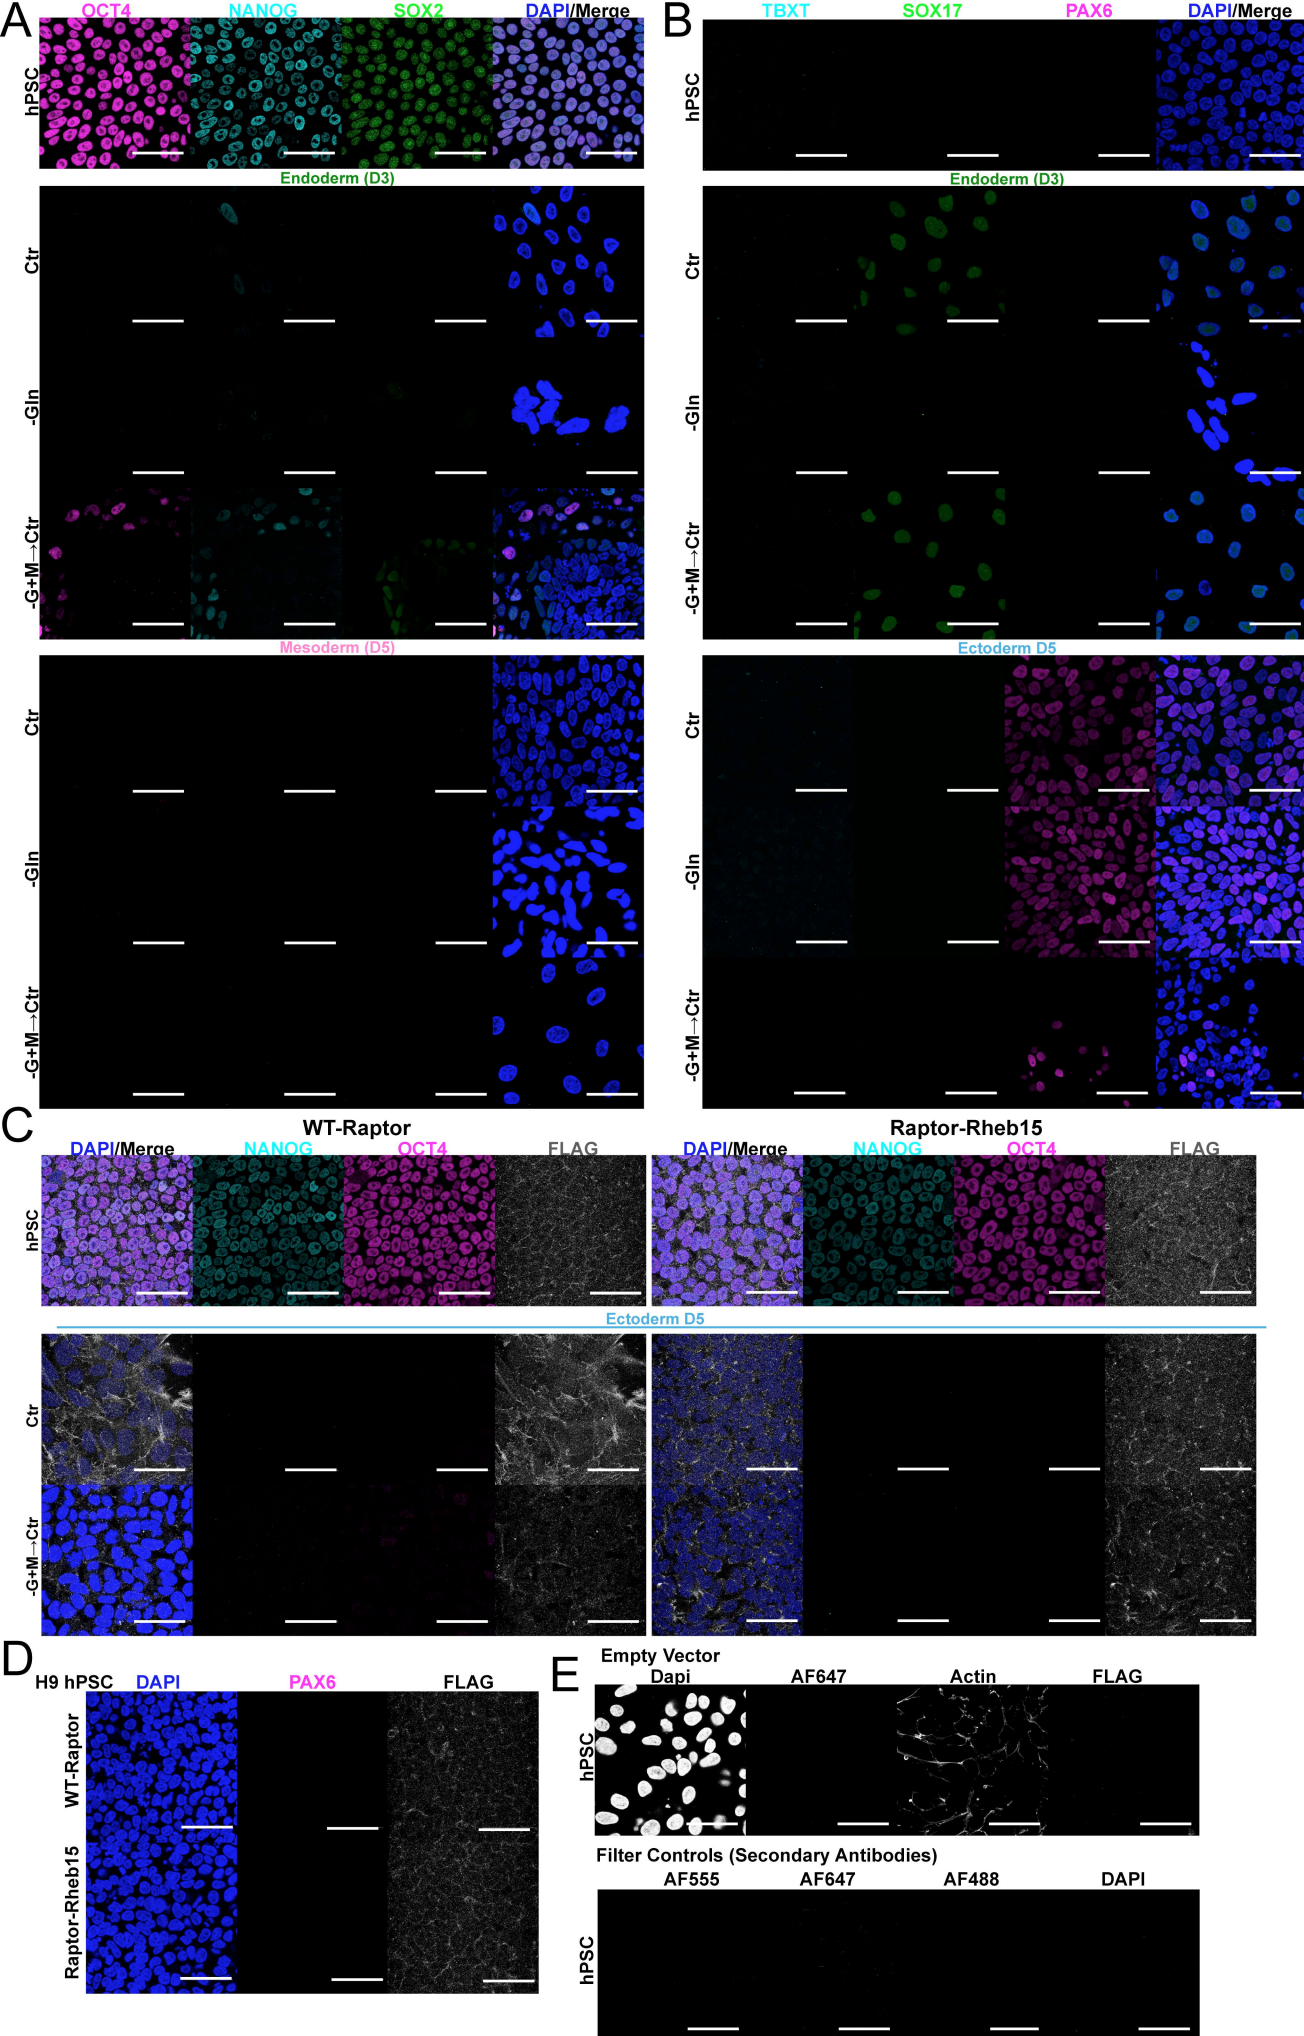

### **Supplemental Figure S5. Immunofluorescence images for biological and technical controls**

*Related to Figure 3 and 4*

**(A)** Representative immunofluorescence images of pluripotent biomarkers in (Top) H9 hPSCs grown in mTESR, and H9-derived (Middle) D3 endoderm and (Bottom) D5 mesoderm cells grown in Gln-supplemented (Ctr), Gln-free (-Gln), or Gln-repletion follow initial 14h Gln-starvation (-G+M→Ctr). OCT4 (magenta, pluripotent); NANOG (cyan, pluripotent); SOX2 (green, pluripotent); DAPI (blue, nucleus). Scale bar indicates 50  $\mu$ m.

**(B)** Representative immunofluorescence images of tri-lineage biomarkers in (Top) H9 hPSCs grown in mTESR, and H9-derived (Middle) D3 endoderm and (Bottom) D5 ectoderm cells grown in Gln-supplemented (Ctr), Gln-free (-Gln), or Gln-repletion follow initial 14h Gln-starvation (-G+M→Ctr). TBXT (cyan, mesoderm); SOX17 (green, endoderm); PAX6 (magenta, ectoderm); DAPI (blue, nucleus). Scale bar indicates 50  $\mu$ m.

**(C)** Representative immunofluorescence images of pluripotent biomarkers in H9-derived D5 (Left) WT-Raptor or (Right) Raptor-Rheb15 ectoderm cells grown in Gln-supplemented (Ctr) or Gln-repletion follow initial 14h Gln-starvation (-G+M→Ctr). DAPI (blue, nucleus); NANOG (cyan, pluripotent); OCT4 (magenta, ectoderm); FLAG (grey, transduced cell line reporter). Scale bar indicates 50  $\mu$ m.

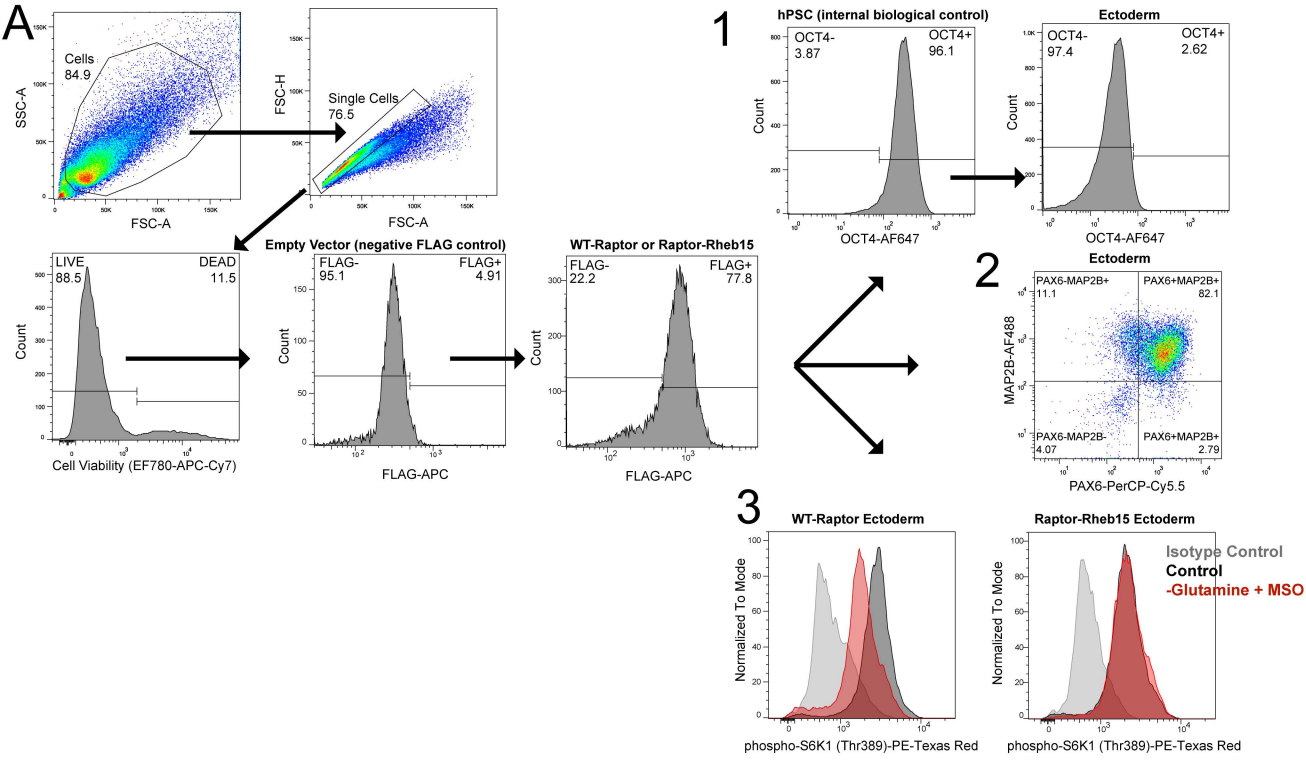

**Supplemental Figure S6. Flow cytometry gating strategy**

*Related to Figure 3 and 4*

**(A)** Gating strategy for flow cytometry analysis. This figure reflects gating strategy used for flow cytometry quantifications in Figures 1-4, S1-S4.
